# Supplementary material for: Hypertension prevalence, awareness, treatment, and control and predicted 10-year CVD risk: a cross-sectional study of Seven Communities in East and West Africa (SevenCEWA)
Source: Research Square preprint supplement (doi:10.21203/rs.3.rs-25100/v4), 2020-11-09
Supplement: Supplementary file 1 [file 8f8f839721f7eb6f3076075b.docx]

**Appendix Text:** Recruitment of study participants, SevenCEWA study 2018

In Kenya, participants were randomly selected from the Nairobi Urban Health and Demographic Surveillance System (NUHDSS) registry. A list of potential participants was collected from the NUHDSS and the inclusion and exclusion criteria were applied. Finally, we randomly selected 300 participants from the list of potential participants.

Similarly, participants from Nigerian sites were selected using random sampling techniques. In Okpok Ikpa site, a house-to-house survey of adults was performed in the rural areas of Okpok Ikpa, Odukpani LGA, Cross River State, south-south region of Nigeria. In Ogane Uge site in Nigeria, we selected a random sample of households were selected from rural areas of Ogane-Uge, Oganenigwu, Dekina L.G.A, all in Kogi State. In Olorunda Abaa of Oyo State, participants were selected from a random sample of households. In Ikire site, we conducted a household survey among adults in Ikire, Irewole LGA, Osun state, a semi-urban community in South West Nigeria.

In Uganda, participants were sampled from all divisions of Soroti municipality. Starting at a landmark such as church/mosque or school, and selected every third household to the right of the main entrance to the landmark. The first sampled household was the initiator of the sample in that area and sampled every third household on the right of the main entrance of the previous household until the sample was achieved.

In Tanzania, participants were selected by simple random sampling from a list of households of Ukonga ward, Ilala municipal, Dar es Salaam region in the Dar es Salaam Health and Demographic Surveillance System (HDSS).
